# Supplementary material for: Mutagenicity of N-acyloxy-N-alkoxyamides as an indicator of DNA intercalation part 1: evidence for naphthalene as a DNA intercalator
Source: Royal Society of Chemistry journal article supplement (doi:10.1039/c6ob00162a), 2016-01-01

### <sup>1</sup>H and <sup>13</sup>C NMR for hydroxamic ester precursors to 3-9, 15 and structures 16 and 17

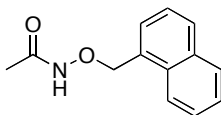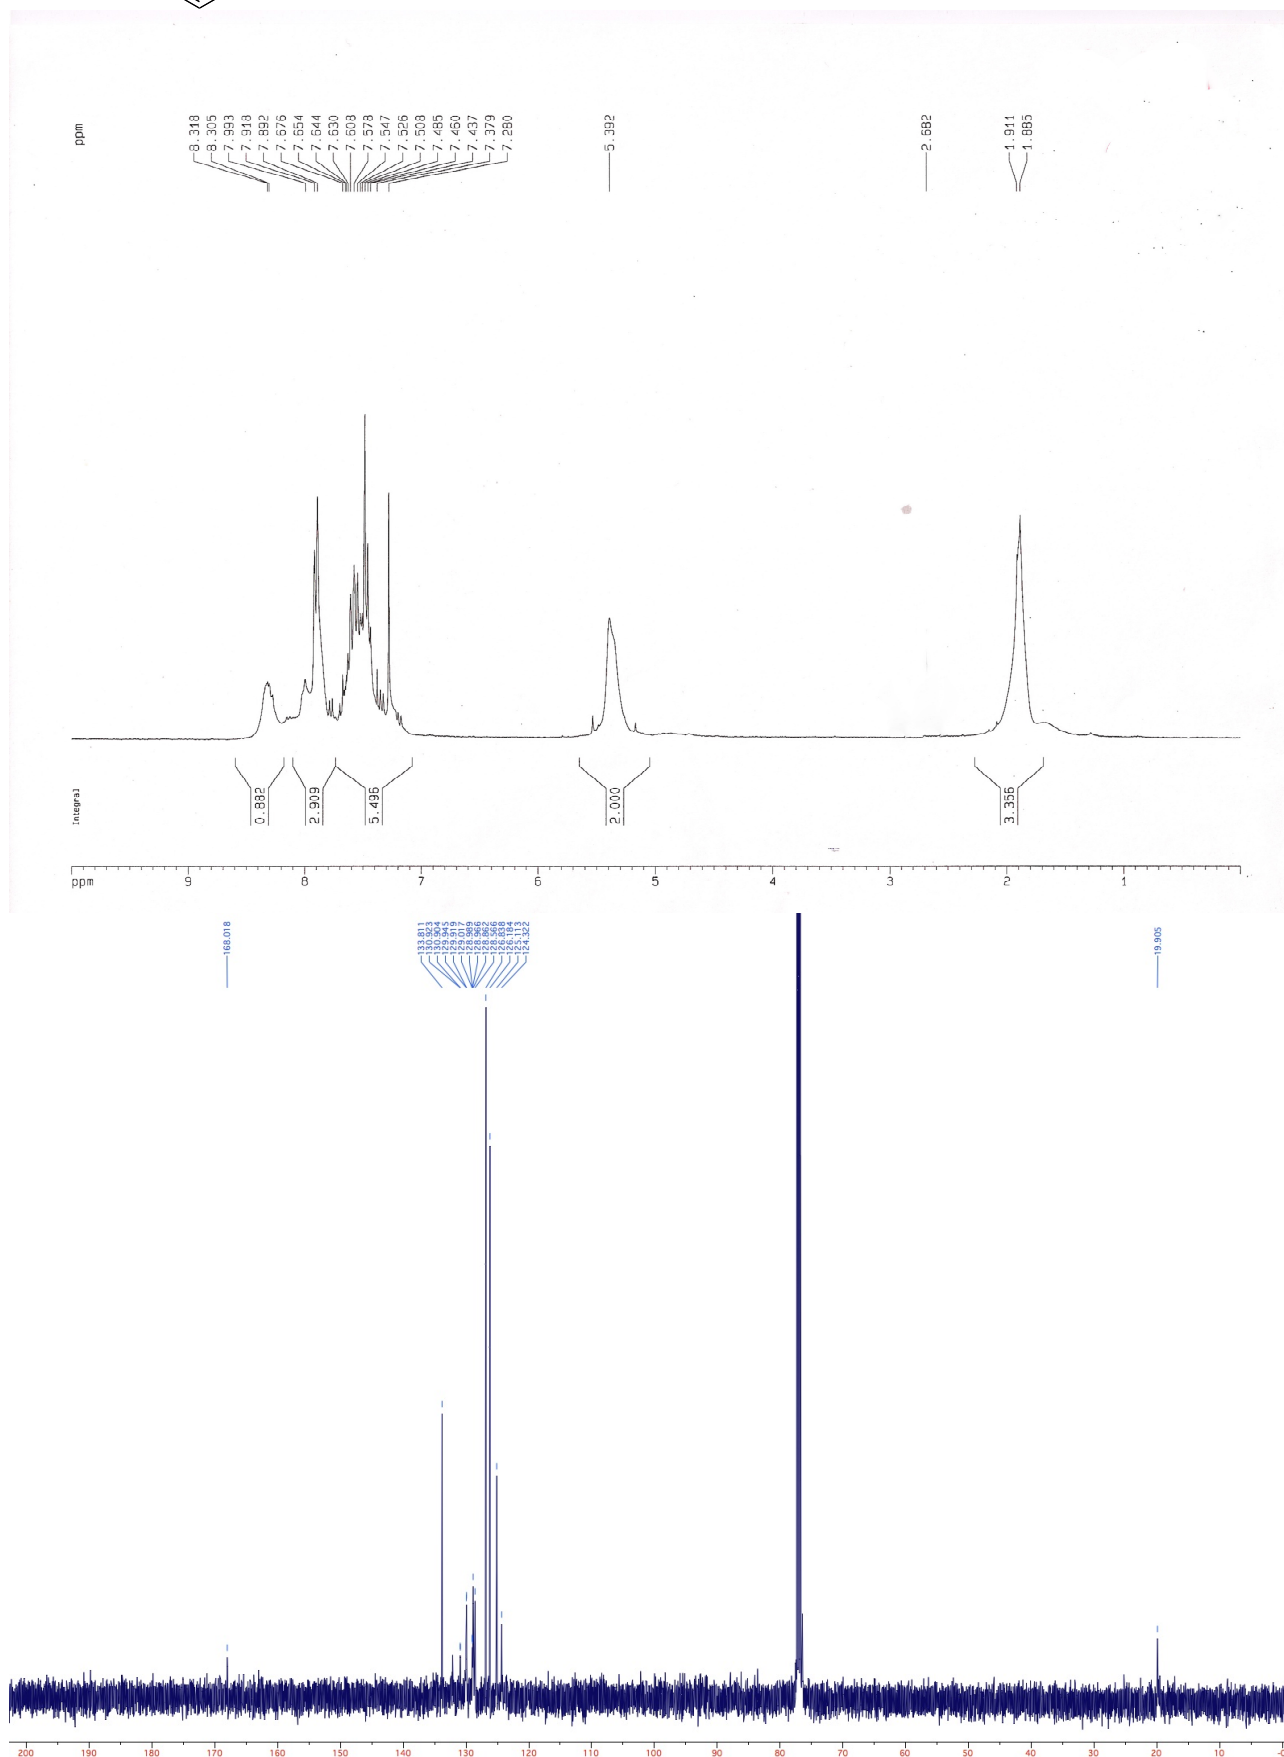

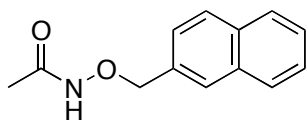

ppm

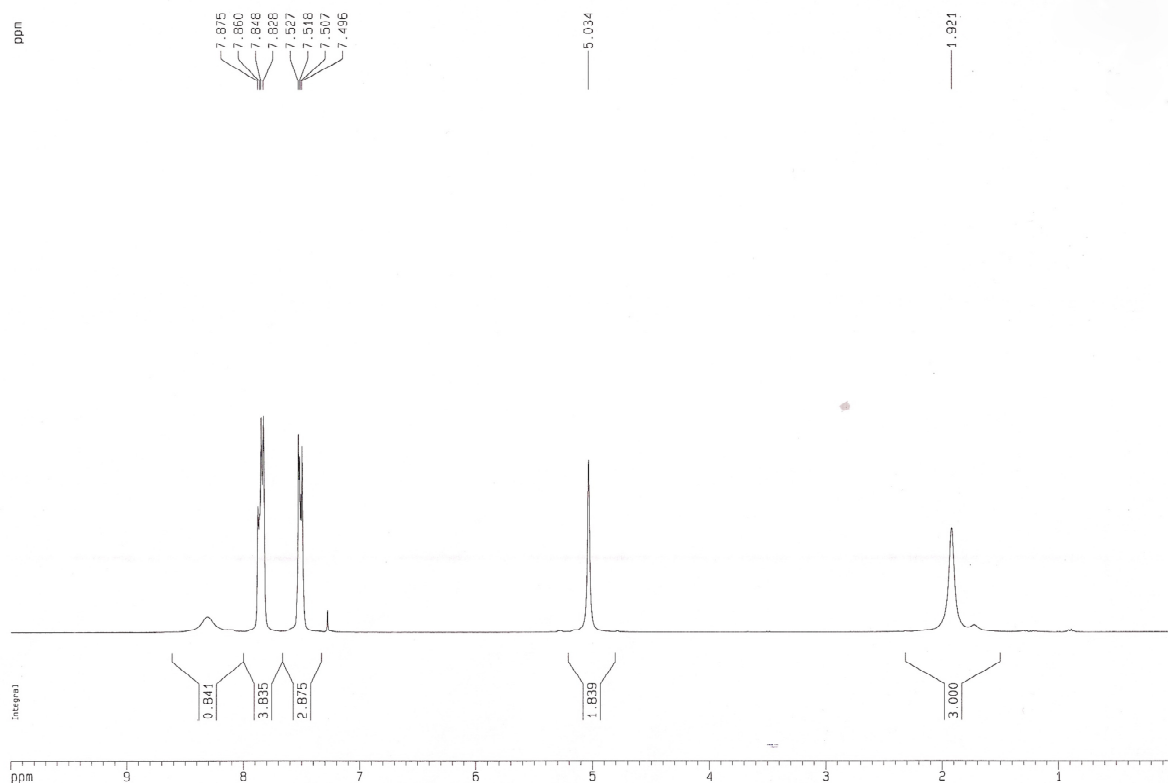

ppm

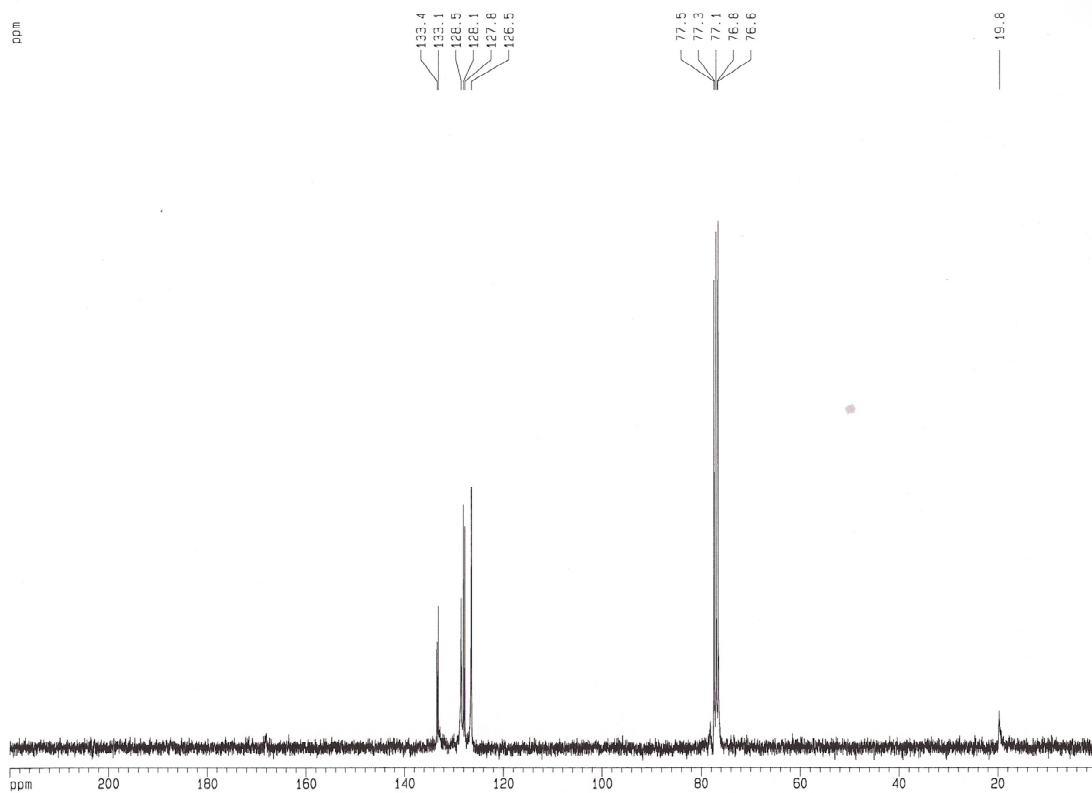

50°C versions

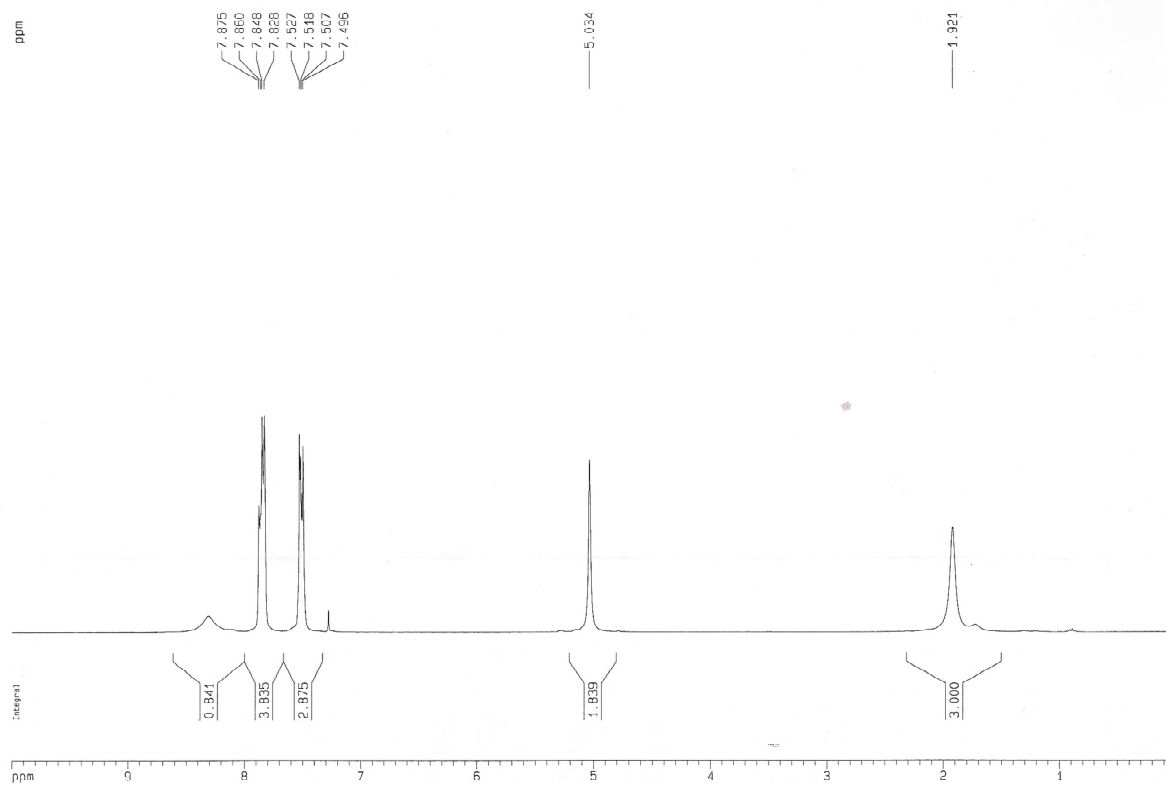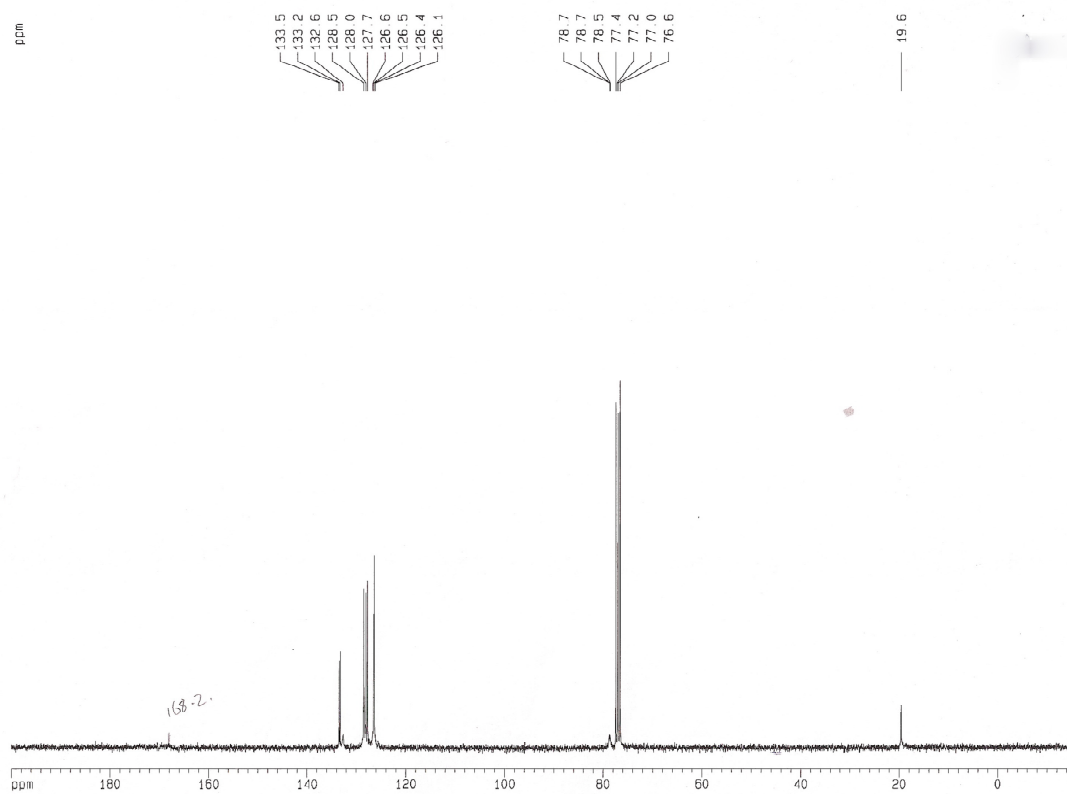

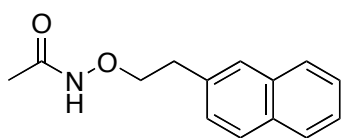

50°C Versions

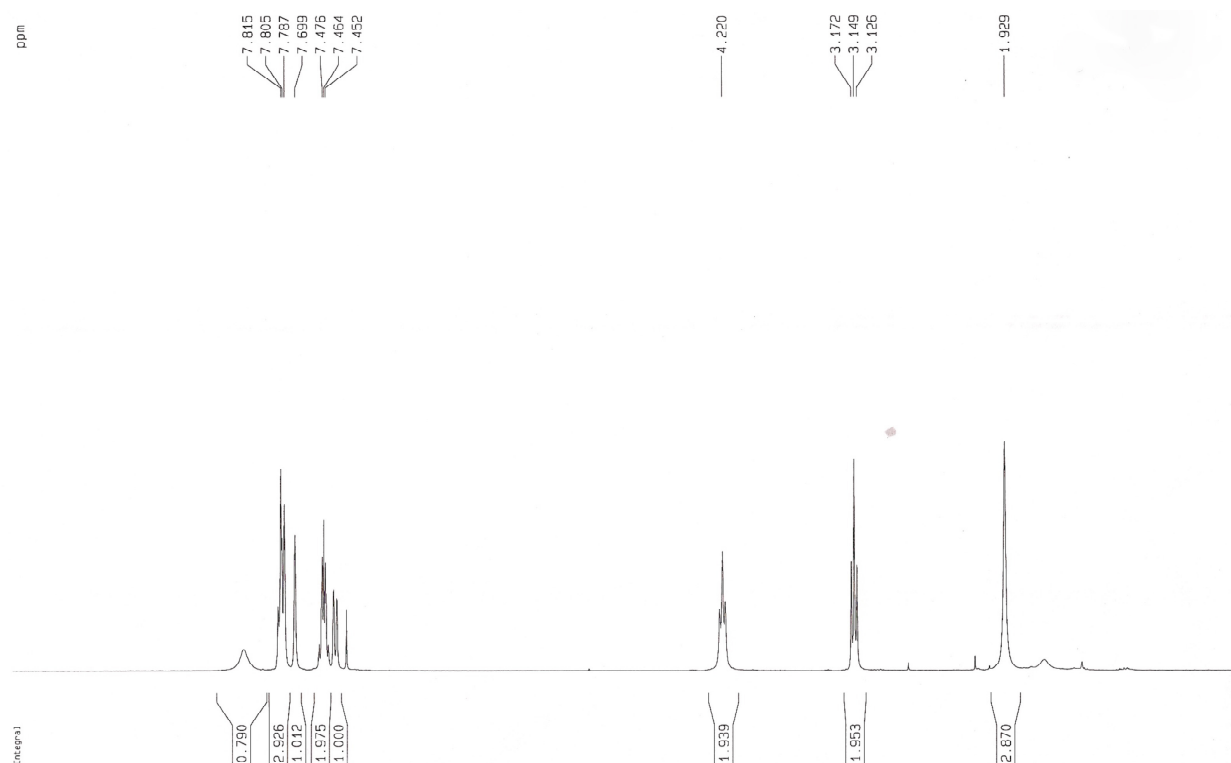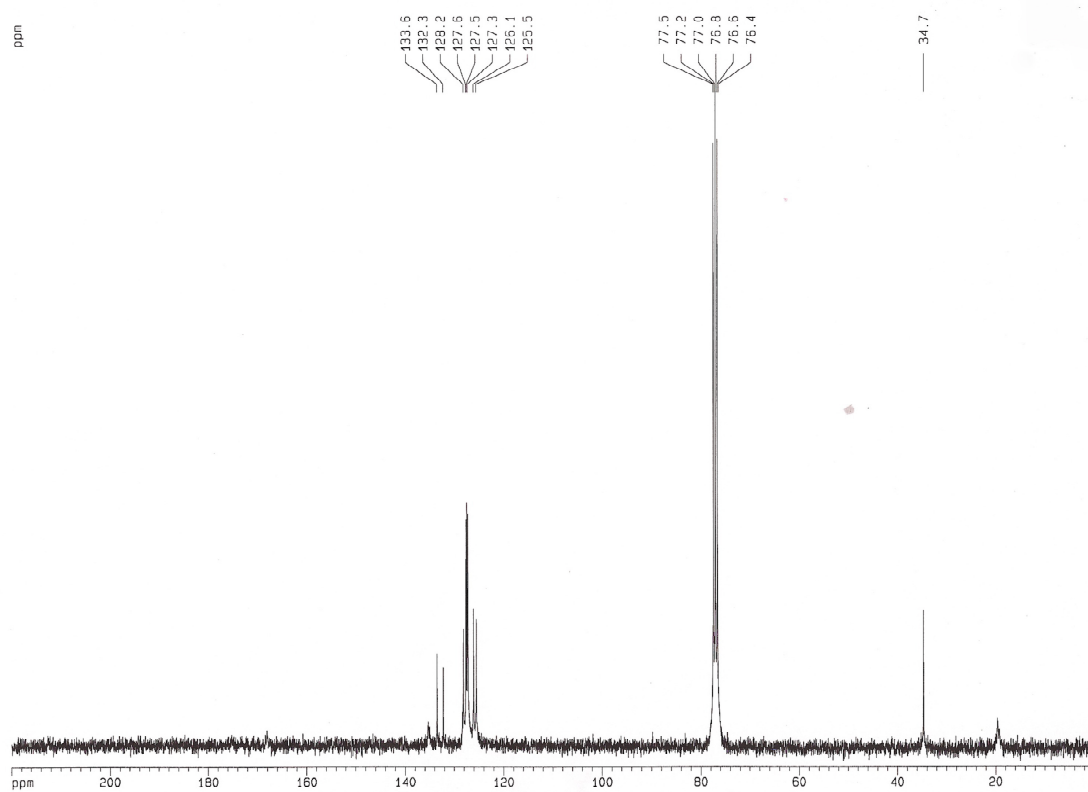



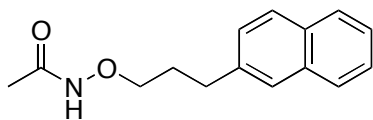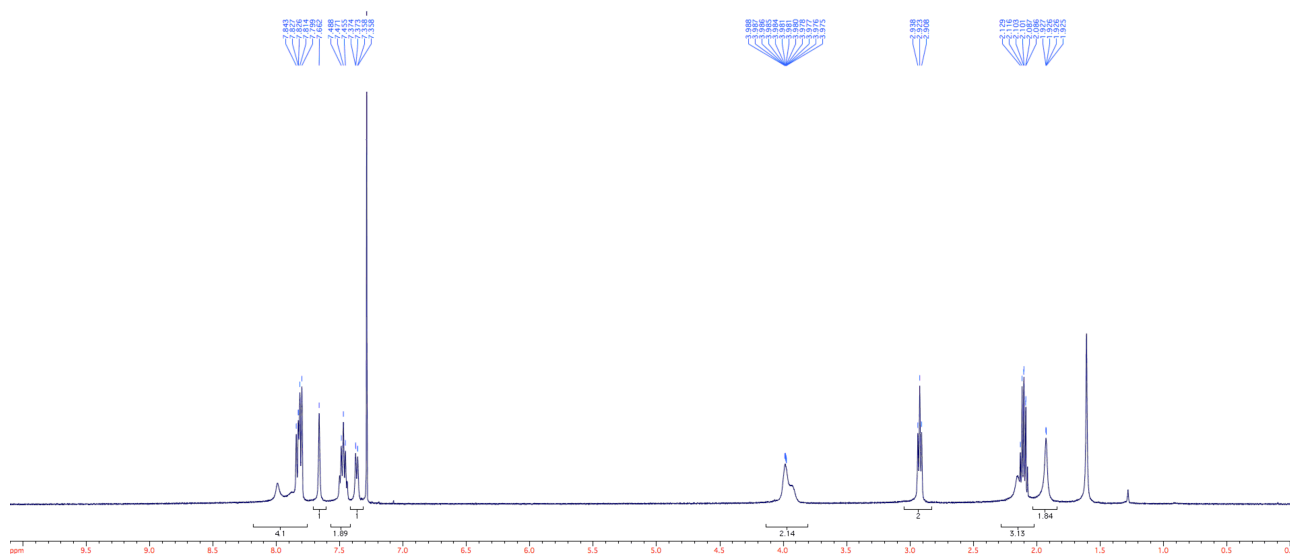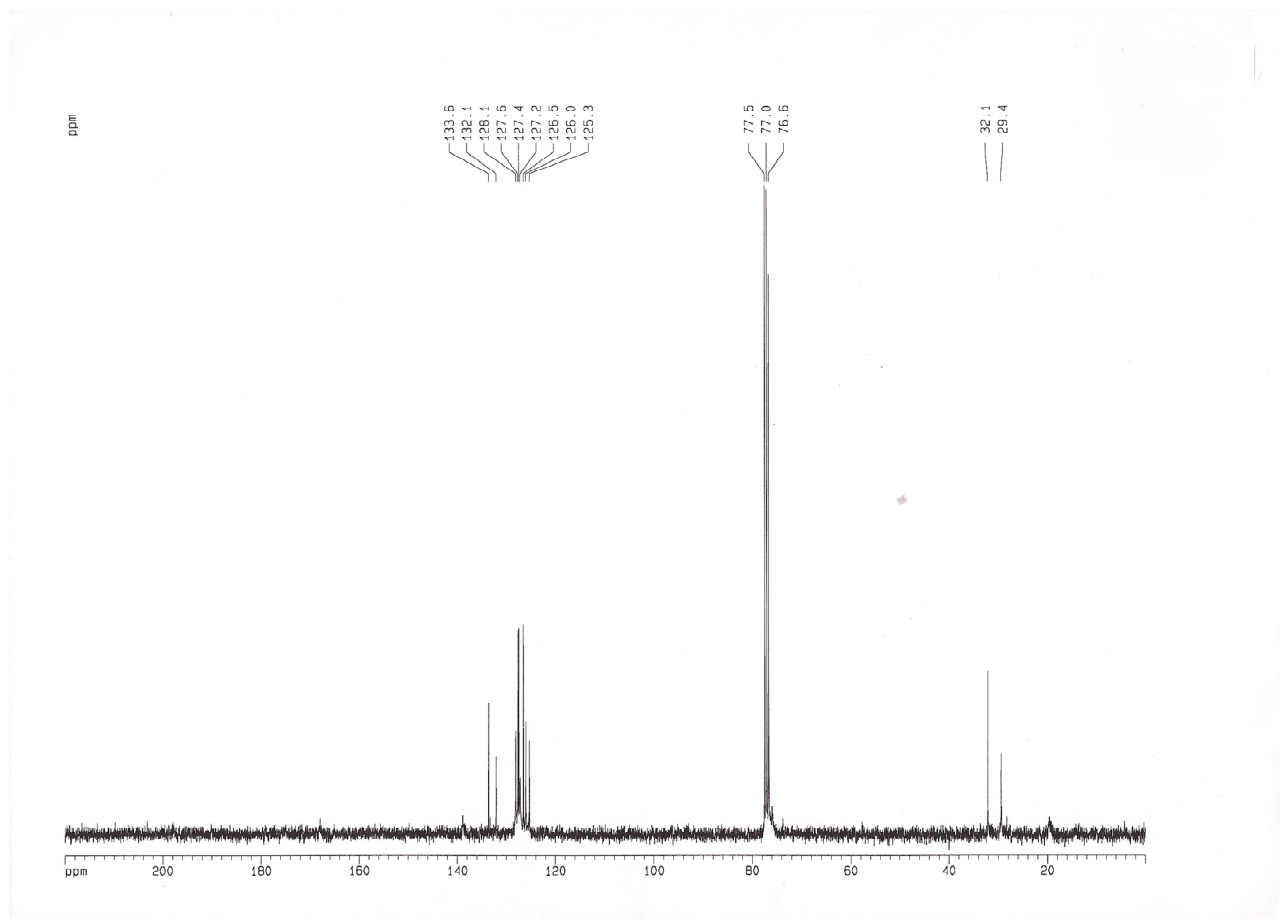

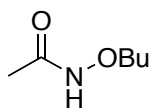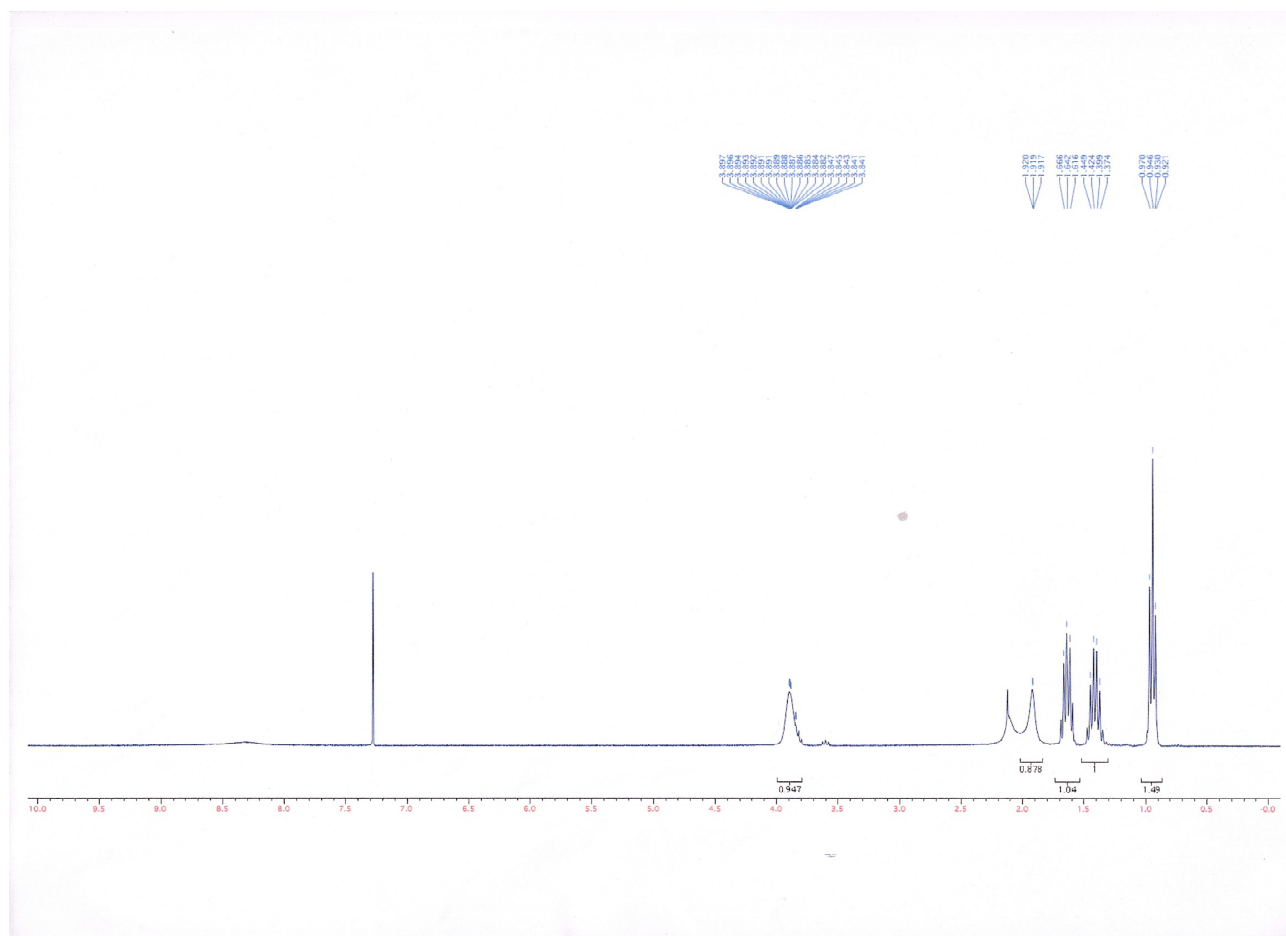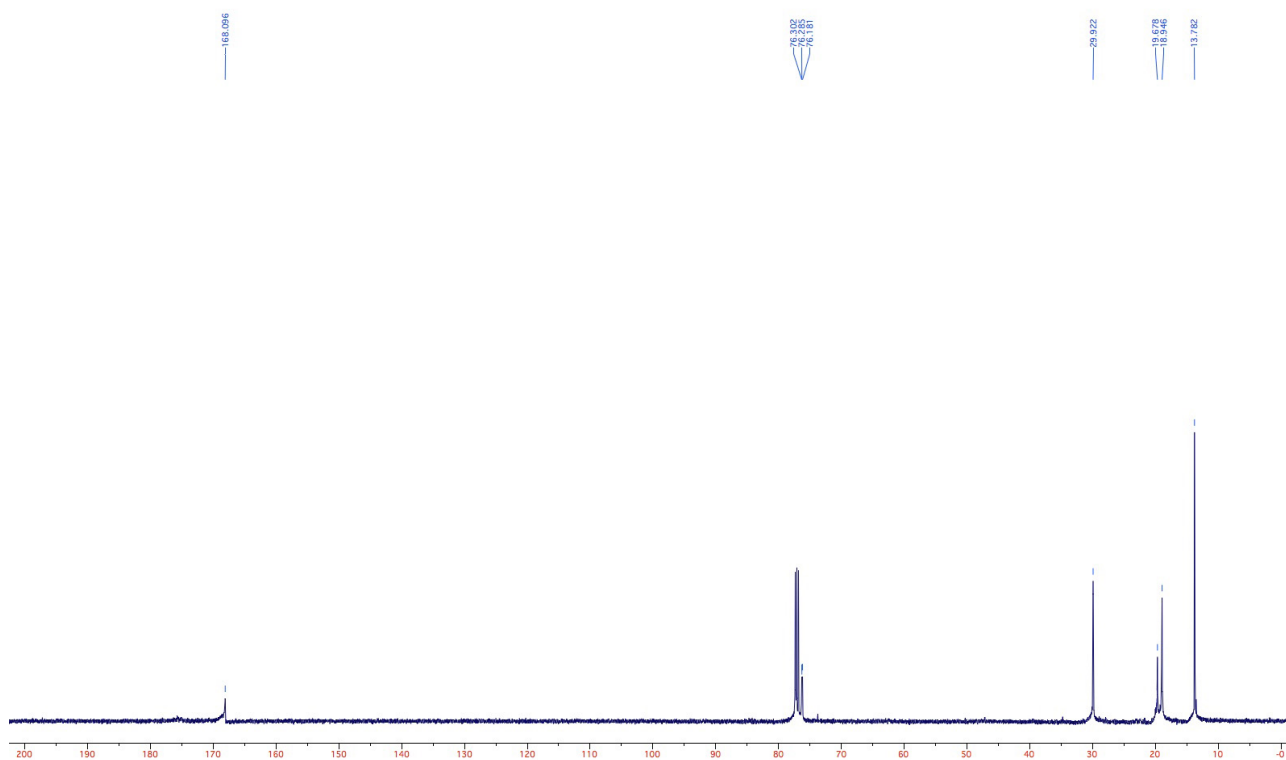

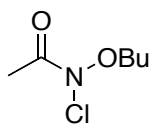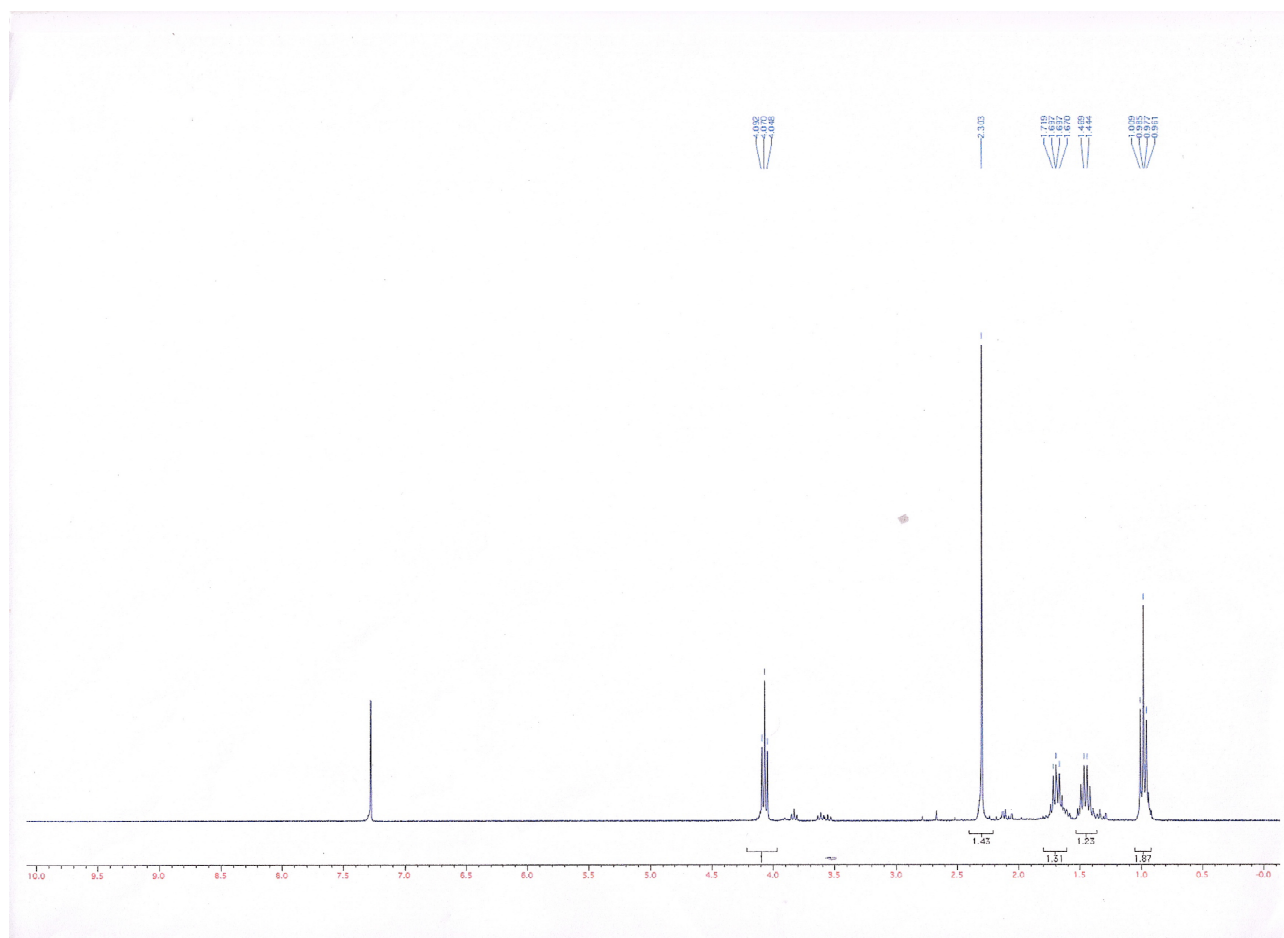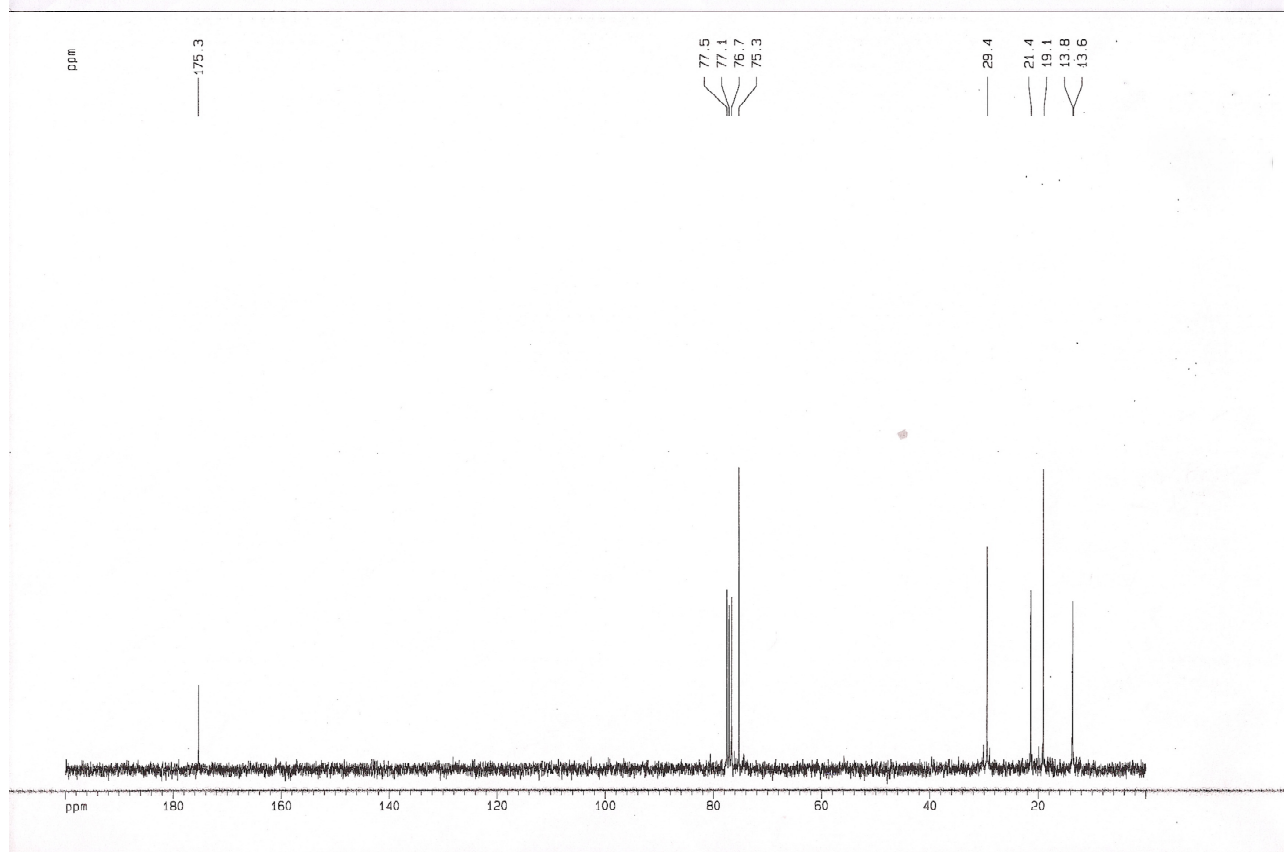

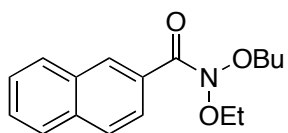

16

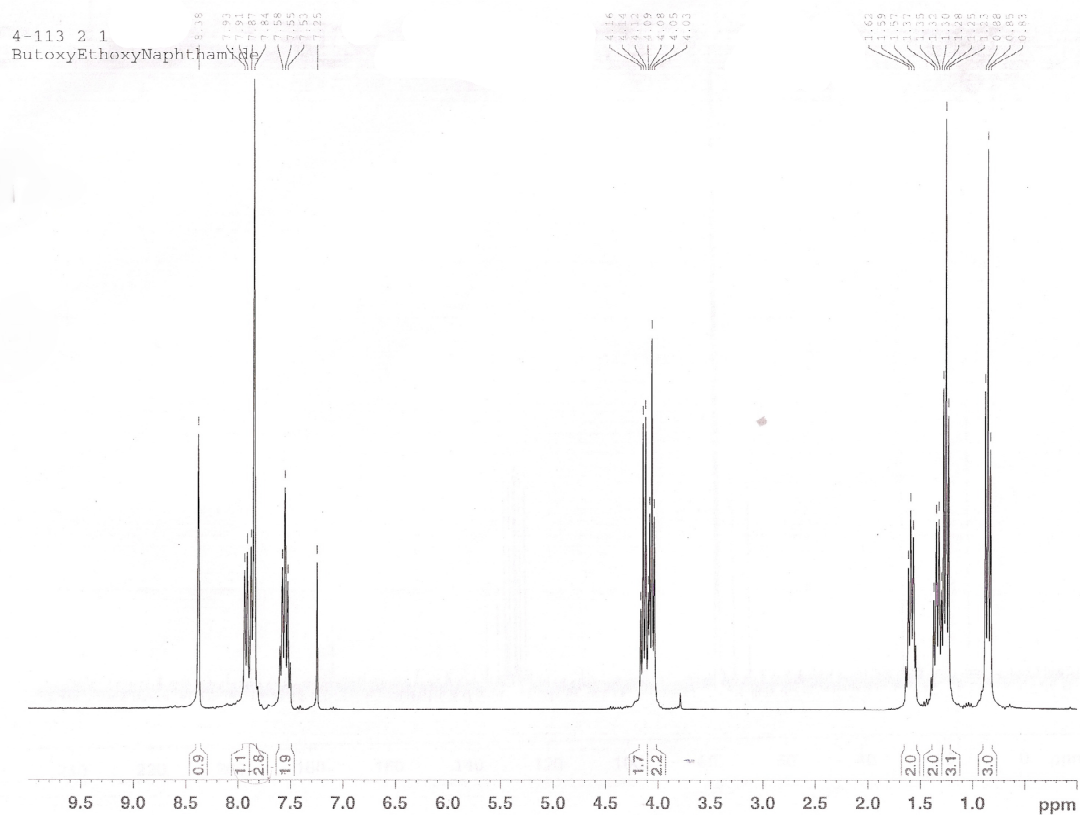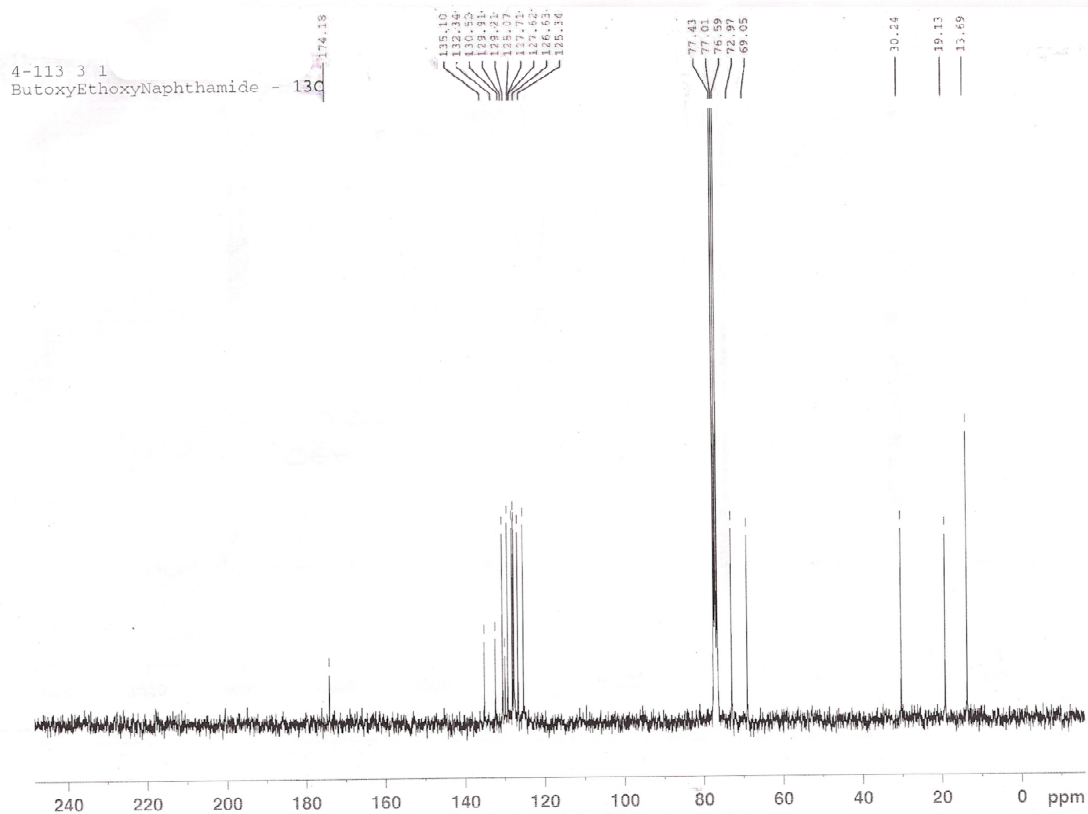

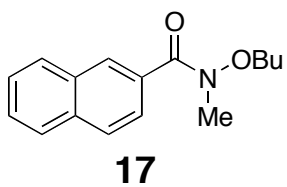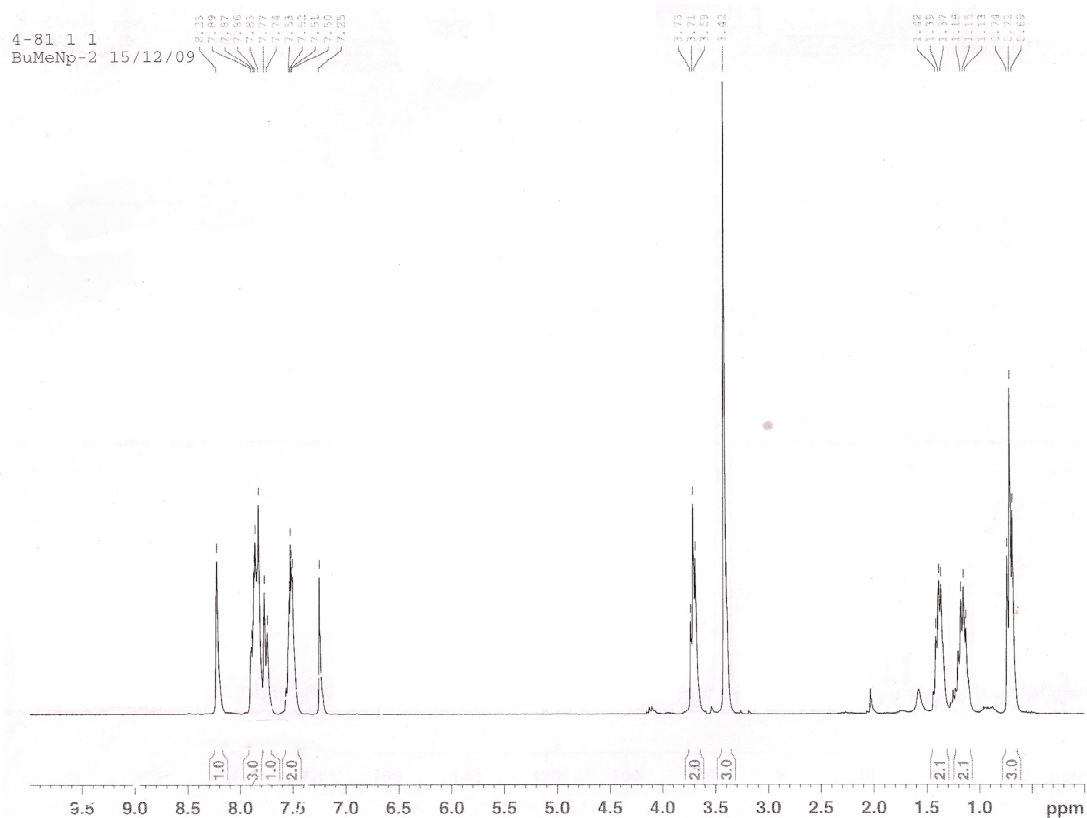

Off resonance  $^{13}\text{C}$

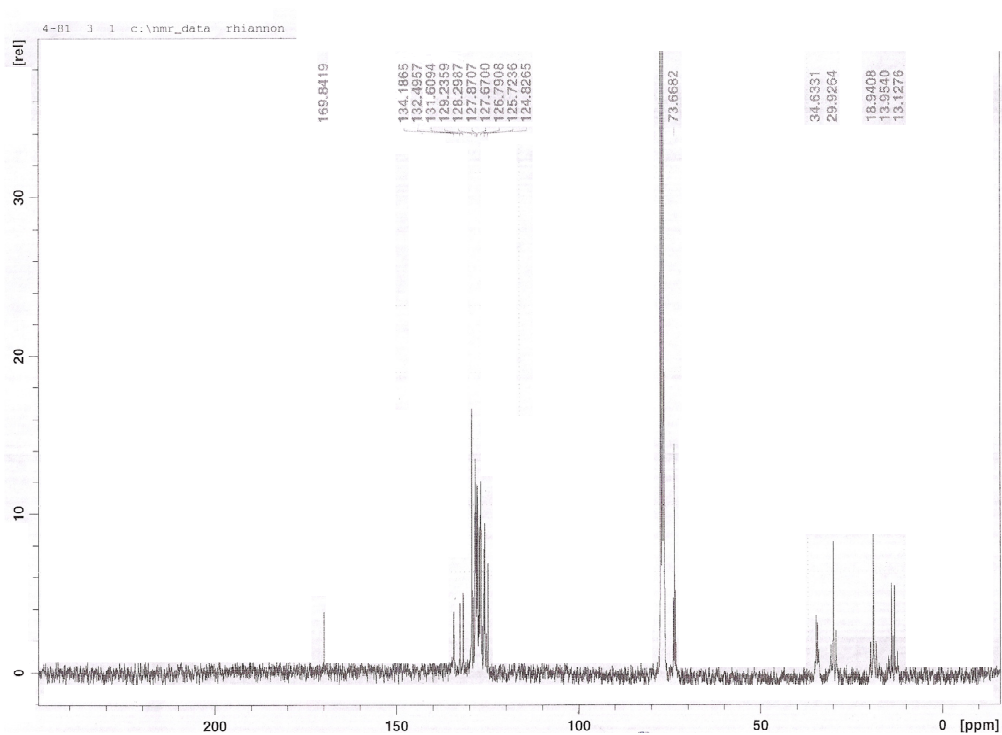

Supplement: c6ob00162a1.pdf [file c6ob00162a1.pdf]
