# Supplementary material for: Mutagenicity of N-acyloxy-N-alkoxyamides as an indicator of DNA intercalation part 1: evidence for naphthalene as a DNA intercalator
Source: Royal Society of Chemistry journal article supplement (doi:10.1039/c6ob00162a), 2016-01-01
Supplement: c6ob00162a2.pdf [file c6ob00162a2.pdf]

## Mutagenicity of *N*-acyloxy-*N*-alkoxyamides as an indicator of DNA intercalation part 1: evidence for naphthalene as a DNA intercalator.

Tony. M. Banks, Samuel F. Clay, Stephen A. Glover\*\* and Rhiannon R. Schumacher.

Chemistry Department, School of Science and Technology, University of New England, Armidale  
New South Wales 2351, Australia.

### Supplementary Table . Data for linear QSAR Equation 3 and bilinear QSAR Equation 4

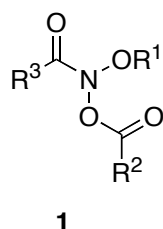

QSAR parameters  $\text{Log}P$ ,  $\text{p}K_A$ ,  $E_S^1$ ,  $E_S^2$ ,  $E_S^3$ ,  $I$  and  $\text{Log}(\beta P+1)$  for *N*-acyloxy-*N*-alkoxyamides **1**

| Structure <sup>a</sup> | R <sup>1</sup> , R <sup>2</sup> , R <sup>3</sup> | Experimental<br>LogTA100 <sup>b</sup> | LogP <sup>c</sup> | pK <sub>A</sub> <sup>d</sup> | E <sub>S</sub> <sup>1e</sup> | E <sub>S</sub> <sup>2f</sup> | E <sub>S</sub> <sup>3g</sup> | I <sup>h</sup> | Log(βP+1) <sup>i</sup> |
|------------------------|--------------------------------------------------|---------------------------------------|-------------------|------------------------------|------------------------------|------------------------------|------------------------------|----------------|------------------------|
| 1                      | Et, Me, Ph                                       | 2.49                                  | 1.54              | 4.76                         | 0                            | 0                            | 0                            | 0              | -2.97223E-06           |
| 2                      | Pr, Me, Ph                                       | 2.53                                  | 2.02              | 4.76                         | 0                            | 0                            | 0                            | 0              | -8.97594E-06           |
| 3                      | Oct, Me, Ph                                      | 2.88                                  | 4.11              | 4.76                         | 0                            | 0                            | 0                            | 0              | -0.001102891           |
| 4                      | Pr <sup>i</sup> , Me, Ph                         | 2.40                                  | 1.86              | 4.76                         | 0                            | 0                            | 0                            | 0              | -6.20985E-06           |
| 5[14]                  | Bu, Me, Ph                                       | 2.50                                  | 2.44              | 4.76                         | 0                            | 0                            | 0                            | 0              | -2.36087E-05           |
| 6                      | Bu, Me, (4-MeO)Ph                                | 2.73                                  | 2.32              | 4.76                         | -0.55                        | 0                            | 0                            | 0              | -1.79092E-05           |
| 7                      | Bu, Me, (4-Ph)Ph                                 | 2.92                                  | 4.12              | 4.76                         | -2.41                        | 0                            | 0                            | 0              | -0.001128548           |
| 8                      | Bu, Me, (4-Me)Ph                                 | 2.48                                  | 2.93              | 4.76                         | -1.24                        | 0                            | 0                            | 0              | -7.29538E-05           |
| 9                      | Bu, Me, (4-Cl)Ph                                 | 2.54                                  | 3.00              | 4.76                         | -0.97                        | 0                            | 0                            | 0              | -8.5712E-05            |
| 10                     | Bu, Me, (4-Br)Ph                                 | 2.69                                  | 3.27              | 4.76                         | -1.16                        | 0                            | 0                            | 0              | -0.00015959            |
| 11                     | Bu, Me, (4-NO <sub>2</sub> )Ph                   | 2.16                                  | 2.48              | 4.76                         | -1.76                        | 0                            | 0                            | 0              | -2.58864E-05           |
| 12                     | Bu, Me, (3-NO <sub>2</sub> )Ph                   | 2.45                                  | 2.48              | 4.76                         | 0                            | 0                            | 0                            | 0              | -2.58864E-05           |
| 13                     | Bu, Me, (4-Bu <sup>i</sup> )Ph                   | 2.37                                  | 4.15              | 4.76                         | -2.78                        | 0                            | 0                            | 0              | -0.001209148           |
| 14                     | Bn, Me, Ph                                       | 2.63                                  | 2.93              | 4.76                         | 0                            | 0                            | 0                            | 0              | -7.29538E-05           |
| 15                     | (4-MeO)Bn, Me, Ph                                | 2.70                                  | 2.81              | 4.76                         | 0                            | -0.55                        | 0                            | 0              | -5.53422E-05           |
| 16                     | (4-PhO)Bn, Me, Ph                                | 3.06                                  | 3.96              | 4.76                         | 0                            | -0.55                        | 0                            | 0              | -0.000781077           |
| 17                     | (4-Ph)Bn, Me, Ph                                 | 3.09                                  | 4.61              | 4.76                         | 0                            | -2.41                        | 0                            | 0              | -0.003478116           |
| 18                     | (4-Me)Bn, Me, Ph                                 | 2.78                                  | 3.42              | 4.76                         | 0                            | -1.24                        | 0                            | 0              | -0.000225409           |

|        |                                                    |      |      |      |       |       |       |   |              |
|--------|----------------------------------------------------|------|------|------|-------|-------|-------|---|--------------|
| 19     | (4-Cl)Bn, Me, Ph                                   | 2.76 | 3.49 | 4.76 | 0     | -0.97 | 0     | 0 | -0.000264821 |
| 20     | (4-Br)Bn, Me, Ph                                   | 2.74 | 3.76 | 4.76 | 0     | -1.16 | 0     | 0 | -0.00049299  |
| 21     | (4-Bu <sup>l</sup> )Bn, Me, Ph                     | 2.60 | 4.64 | 4.76 | 0     | -2.78 | 0     | 0 | -0.003725805 |
| 22     | Bn, Ph, Ph                                         | 3.22 | 4.83 | 4.20 | 0     | 0     | 0     | 0 | -0.005757084 |
| 23     | Bn, (4-MeO)Ph, Ph                                  | 3.06 | 4.70 | 4.31 | 0     | 0     | -0.55 | 0 | -0.004275088 |
| 24     | Bn, (4-Ph)Ph, Ph                                   | 3.70 | 6.51 | 4.21 | 0     | 0     | -2.41 | 0 | -0.214500656 |
| 25     | Bn, (4-Me)Ph, Ph                                   | 3.29 | 5.32 | 4.37 | 0     | 0     | -1.24 | 0 | -0.017550105 |
| 26     | Bn, (4-Cl)Ph, Ph                                   | 3.12 | 5.39 | 3.99 | 0     | 0     | -0.97 | 0 | -0.020548011 |
| 27     | Bn, (4-CHO)Ph, Ph                                  | 2.87 | 4.58 | 3.73 | 0     | 0     | -1.01 | 0 | -0.003246832 |
| 28     | Bn, (4-CN)Ph, Ph                                   | 2.96 | 4.86 | 3.55 | 0     | 0     | -0.51 | 0 | -0.006165917 |
| 29     | Bn, (4-NO <sub>2</sub> )Ph, Ph                     | 2.69 | 4.86 | 3.42 | 0     | 0     | -1.76 | 0 | -0.006165917 |
| 30     | Bn, (4-Bu <sup>l</sup> )Ph, Ph                     | 3.20 | 6.54 | 4.35 | 0     | 0     | -2.78 | 0 | -0.226441169 |
| 31     | Bn, (3-NO <sub>2</sub> )Bn, Ph                     | 2.94 | 4.86 | 3.45 | 0     | 0     | 0     | 0 | -0.006165917 |
| 32     | Bn, (3-MeO)Bn, Ph                                  | 3.23 | 4.70 | 4.09 | 0     | 0     | 0     | 0 | -0.004275088 |
| 33     | -(CH <sub>2</sub> ) <sub>6</sub> -, Me, Ph         | 2.96 | 3.55 | 4.76 | 0     | 0     | 0     | 0 | -0.000304041 |
| 34     | Bu, Ph, Ph                                         | 2.70 | 4.34 | 4.20 | 0     | 0     | 0     | 0 | -0.001871321 |
| 35     | Bu, Me, Me                                         | 1.94 | 0.54 | 4.76 | 0     | 0     | 0     | 0 | -2.97224E-07 |
| 36[15] | Bu, Ph, Me                                         | 2.65 | 2.44 | 4.20 | 0     | 0     | 0     | 0 | -2.36087E-05 |
| 37     | Bn, Me, Me                                         | 2.22 | 1.04 | 4.76 | 0     | 0     | 0     | 0 | -9.39905E-07 |
| 38     | Bn, Ph, Me                                         | 2.90 | 2.93 | 4.20 | 0     | 0     | 0     | 0 | -7.29538E-05 |
| 39     | (2,6-diMe)Bn, Me, Ph                               | 3.04 | 3.91 | 4.76 | 0     | 0     | 0     | 0 | -0.000696203 |
| 40     | Bu, Me, (3,5-diMe)Ph                               | 2.74 | 3.42 | 4.76 | 0     | 0     | 0     | 0 | -0.000225409 |
| 41     | Bn, Ph, (4-Bu <sup>l</sup> )Ph                     | 3.50 | 6.54 | 4.20 | -2.78 | 0     | 0     | 0 | -0.226441169 |
| 42     | (4-Bu <sup>l</sup> )Bn, Ph, Ph                     | 3.05 | 6.54 | 4.20 | 0     | -2.78 | 0     | 0 | -0.226441169 |
| 43     | (4-Bu <sup>l</sup> )Bn, Me, (4-Bu <sup>l</sup> )Ph | 2.89 | 6.31 | 4.76 | -2.78 | -2.78 | 0     | 0 | -0.147056222 |
| 44     | 2-Bu, Me, Ph                                       | 2.59 | 2.07 | 4.76 | 0     | 0     | 0     | 0 | -1.00712E-05 |
| 45     | Bu <sup>l</sup> , Me, Ph                           | 2.47 | 2.34 | 4.76 | 0     | 0     | 0     | 0 | -1.87532E-05 |
| 46     | (2-Me)Bn, Me, Ph                                   | 2.71 | 3.42 | 4.76 | 0     | 0     | 0     | 0 | -0.000225409 |
| 47     | (3-Me)Bn, Me, Ph                                   | 2.86 | 3.42 | 4.76 | 0     | 0     | 0     | 0 | -0.000225409 |
| 48     | (3,5-diMe)Bn, Me, Ph                               | 2.95 | 3.91 | 4.76 | 0     | 0     | 0     | 0 | -0.000696203 |
| 49     | Bu, (4-Me)Ph, Ph                                   | 2.91 | 4.83 | 4.37 | 0     | 0     | -1.24 | 0 | -0.005757084 |
| 50     | Bu, (4-MeO)Ph, Ph                                  | 2.87 | 4.21 | 4.47 | 0     | 0     | -0.55 | 0 | -0.001388002 |
| 51[2]  | Bu, Me, 2-Np                                       | 3.59 | 3.44 | 4.76 | 0     | 0     | 0     | 1 | -0.00023603  |
| 52[3]  | Bu, 2-Np, Me                                       | 3.64 | 3.44 | 4.16 | 0     | 0     | 0     | 1 | -0.00023603  |
| 53[4]  | Bu, 2-NpCH <sub>2</sub> , Me                       | 3.4  | 3.38 | 4.24 | 0     | 0     | 0     | 1 | -0.00020558  |
| 54[5]  | Bu, 2-Np(CH <sub>2</sub> ) <sub>2</sub> , Me       | 3.46 | 3.8  | 4.57 | 0     | 0     | 0     | 1 | -0.000540523 |
| 55[6]  | 1-NpCH <sub>2</sub> , Me, Me                       | 3.53 | 2.03 | 4.76 | 0     | 0     | 0     | 1 | -9.18501E-06 |
| 56[7]  | 2-NpCH <sub>2</sub> , Me, Me                       | 3.57 | 2.03 | 4.76 | 0     | 0     | 0     | 1 | -9.18501E-06 |
| 57[8]  | 2-Np(CH <sub>2</sub> ) <sub>2</sub> , Me, Me       | 3.41 | 2.31 | 4.76 | 0     | 0     | 0     | 1 | -1.75015E-05 |
| 58[9]  | 2-Np(CH <sub>2</sub> ) <sub>3</sub> , Me, Me       | 3.48 | 2.73 | 4.76 | 0     | 0     | 0     | 1 | -4.60322E-05 |
| 59     | n-Hex, n-Pent, Ph                                  | 3.42 | 5.18 | 4.86 | 0     | 0     | 0     | 0 | -0.012784286 |

|    |                   |      |      |      |   |   |   |   |              |
|----|-------------------|------|------|------|---|---|---|---|--------------|
| 60 | n-Hept, n-Hex, Ph | 3.25 | 6.02 | 4.78 | 0 | 0 | 0 | 0 | -0.08159238  |
| 61 | n-Oct, n-Hept, Ph | 3.02 | 6.85 | 4.78 | 0 | 0 | 0 | 0 | -0.379728413 |
| 62 | n-Non, n-Oct, Ph  | 2.95 | 7.69 | 4.78 | 0 | 0 | 0 | 0 | -1.0280498   |
| 63 | n-Dec, n-Non, Ph  | 2.88 | 8.52 | 4.79 | 0 | 0 | 0 | 0 | -1.821894515 |

<sup>a</sup> Structures in [square brackets] correspond to those in the paper; Data for structures 1-58 used for Equations 3, 1-63 for Equation 4

<sup>b</sup> LogTA100 = log<sub>10</sub>(revertants at 1 μmol/plate);

<sup>c</sup> Log *P* calculated according to Ghose-Crippen;

<sup>d</sup> p*K*<sub>A</sub> of the carboxylic acid corresponding to the acyloxyl group;

<sup>e</sup> *E*<sub>s</sub><sup>1</sup> Taft steric parameter for *para*-substituent on a benzamide side chain;

<sup>f</sup> *E*<sub>s</sub><sup>2</sup> Taft steric parameter for *para*-substituent on a benzyloxyl side chain;

<sup>g</sup> *E*<sub>s</sub><sup>3</sup> Taft steric parameter for *para*-substituent on a benzoyloxyl side chain;

<sup>h</sup> Indicator variable *I*=1 for naphthalene bearing mutagens (entries 51-58) otherwise 0;

<sup>i</sup> Logβ=-6.705

## Regression analyses for Supplementary Table 1

Supplementary data for QSAR in Equation 3 (entries 1-58):

### SUMMARY OUTPUT

| <i>Regression Statistics</i> |             |
|------------------------------|-------------|
| Multiple R                   | 0.922063865 |
| R Square                     | 0.850201771 |
| Adjusted R Square            | 0.83257845  |
| Standard Error               | 0.161997269 |
| Observations                 | 58          |

  

| ANOVA      |           |             |             |             |                       |
|------------|-----------|-------------|-------------|-------------|-----------------------|
|            | <i>df</i> | <i>SS</i>   | <i>MS</i>   | <i>F</i>    | <i>Significance F</i> |
| Regression | 6         | 7.596278708 | 1.266046451 | 48.24299398 | 2.52224E-19           |
| Residual   | 51        | 1.338398878 | 0.026243115 |             |                       |
| Total      | 57        | 8.934677586 |             |             |                       |

  

|                                    | <i>Coefficients</i> | <i>Standard Error</i> | <i>t Stat</i> | <i>P-value</i> | <i>Lower 95%</i> | <i>Upper 95%</i> | <i>Lower 95.0%</i> | <i>Upper 95.0%</i> |
|------------------------------------|---------------------|-----------------------|---------------|----------------|------------------|------------------|--------------------|--------------------|
| Intercept                          | 1.117236054         | 0.412343627           | 2.709478168   | 0.009153984    | 0.289421699      | 1.94505041       | 0.289421699        | 1.94505041         |
| Log <i>P</i>                       | 0.261967633         | 0.026913102           | 9.733832623   | 3.20956E-13    | 0.207937327      | 0.315997939      | 0.207937327        | 0.315997939        |
| p <i>K</i> <sub>A</sub>            | 0.174888546         | 0.079324165           | 2.204732261   | 0.032009431    | 0.015638643      | 0.33413845       | 0.015638643        | 0.33413845         |
| <i>E</i> <sub>s</sub> <sup>1</sup> | 0.124967737         | 0.0333362             | 3.748709701   | 0.00045455     | 0.058042524      | 0.19189295       | 0.058042524        | 0.19189295         |
| <i>E</i> <sub>s</sub> <sup>2</sup> | 0.135876125         | 0.038020244           | 3.573783632   | 0.000779782    | 0.059547302      | 0.212204948      | 0.059547302        | 0.212204948        |

|         |             |             |             |             |             |             |             |             |
|---------|-------------|-------------|-------------|-------------|-------------|-------------|-------------|-------------|
| $E_s^3$ | 0.083179961 | 0.050580411 | 1.644509384 | 0.106221948 | -0.01836445 | 0.184724372 | -0.01836445 | 0.184724372 |
| $I$     | 0.830536168 | 0.064360632 | 12.90441283 | 1.09189E-17 | 0.70132681  | 0.959745526 | 0.70132681  | 0.959745526 |

$$\text{Log TA100} = 0.26 (\pm 0.03) \text{Log}P + 0.17 (\pm 0.08) \text{p}K_A + 0.12 (\pm 0.03) E_s^1 + 0.14 (\pm 0.04) E_s^2 + 0.08 (\pm 0.05) E_s^3 + 0.83 (\pm 0.06) I + 1.12 (\pm 0.41)$$

$n = 58, R^2 = 0.85, \text{adj. } R^2 = 0.83, s = 0.16, F = 48.2; \text{LOO CV } Q^2 = 0.85$

Supplementary data for QSAR in Equation 4 (entries 1-63):

#### SUMMARY OUTPUT

| <i>Regression Statistics</i> |             |
|------------------------------|-------------|
| Multiple R                   | 0.902272575 |
| R Square                     | 0.814095799 |
| Adjusted R Square            | 0.790435264 |
| Standard Error               | 0.177690657 |
| Observations                 | 63          |

#### ANOVA

|            | <i>df</i> | <i>SS</i>   | <i>MS</i>   | <i>F</i>    | <i>Significance F</i> |
|------------|-----------|-------------|-------------|-------------|-----------------------|
| Regression | 7         | 7.604631675 | 1.086375954 | 34.40732886 | 6.82835E-18           |
| Residual   | 55        | 1.736568325 | 0.03157397  |             |                       |
| Total      | 62        | 9.3412      |             |             |                       |

|                      | <i>Coefficients</i> | <i>Standard Error</i> | <i>t Stat</i> | <i>P-value</i> | <i>Lower 95%</i> | <i>Upper 95%</i> | <i>Lower 95.0%</i> | <i>Upper 95.0%</i> |
|----------------------|---------------------|-----------------------|---------------|----------------|------------------|------------------|--------------------|--------------------|
| Intercept            | 1.484559313         | 0.396839985           | 3.740951944   | 0.000439186    | 0.689274217      | 2.279844409      | 0.689274217        | 2.279844409        |
| LogP                 | 0.230836382         | 0.02381045            | 9.694751016   | 1.67405E-13    | 0.183119175      | 0.278553589      | 0.183119175        | 0.278553589        |
| Log( $\beta P + 1$ ) | 0.651851424         | 0.12362435            | 5.272840064   | 2.32547E-06    | 0.404102692      | 0.899600155      | 0.404102692        | 0.899600155        |
| $\text{p}K_A$        | 0.111078999         | 0.078360811           | 1.417532546   | 0.161967828    | -0.045959573     | 0.268117572      | -0.045959573       | 0.268117572        |
| $E_s^1$              | 0.085502071         | 0.033419717           | 2.558431952   | 0.013298028    | 0.018527463      | 0.15247668       | 0.018527463        | 0.15247668         |
| $E_s^2$              | 0.086013203         | 0.036545126           | 2.353616263   | 0.022193027    | 0.012775134      | 0.159251272      | 0.012775134        | 0.159251272        |
| $E_s^3$              | 0.009313227         | 0.049657727           | 0.187548395   | 0.851920877    | -0.090203081     | 0.108829535      | -0.090203081       | 0.108829535        |
| $I$                  | 0.846728441         | 0.070324683           | 12.0402738    | 4.78996E-17    | 0.705794627      | 0.987662255      | 0.705794627        | 0.987662255        |

$$\text{LogTA100} = 0.23 (\pm 0.02) \text{Log}P - 0.65 (\pm 0.12) \text{Log}(\beta P + 1) + 0.11 (\pm 0.08) \text{p}K_A + 0.09 (\pm 0.03) E_s^1 + 0.09 (\pm 0.04) E_s^2 + 0.01 (\pm 0.05) E_s^3 + 0.85 (\pm 0.07) I + 1.48 (\pm 0.40)$$

$\text{Log}\beta = -6.705, n = 63, R^2 = 0.81, \text{adj. } R^2 = 0.79, s = 0.18, F = 29.6; \text{LOO CV } Q^2 = 0.76$

## Supplementary Experimental

Synthesis of alcohols 2-(2'-naphthyl)ethanol and 3-(2'-naphthyl)-1-propanol.

### 2-(2'-Naphthyl)ethanol

*2-Naphthylacetic acid.* 2-Bromomethylnaphthalene (20.0 g, 0.091 mol) and potassium cyanide (17.7 g, 0.271 mol) were stirred overnight with sodium carbonate (12.4 g, 0.117 mol) in 25% aqueous ethanol (120 ml), then refluxed for 2hr. The ethanol was removed under reduced pressure. 50 ml of water was added and the residue extracted with ether (3 x 50 ml) and concentrated under reduced pressure. The impure nitrile was acidified with concentrated hydrochloric acid (30 ml) and refluxed for 5 hours. Ammonia was added until basic and the solution decolourised with charcoal and filtered. After acidification with dilute HCl, 2-naphthylacetic acid (6.40 g, 38%) was filtered off as a white solid and used without further purification, mp 139-140 °C (lit.,<sup>1</sup> 138°C);  $\nu_{\max}(\text{CHCl}_3)/\text{cm}^{-1}$  1710s (C=O);  $\delta_{\text{H}}(300 \text{ MHz; CDCl}_3)$  3.84 (2H, s,  $\text{CH}_2\text{CO}_2\text{H}$ ), 7.43 (1H, d, Ar-H), 7.49 (2H, m, Ar-H), 7.76 (1H, s, Ar-H), 7.78-7.87 (3H, m, Ar-H);  $\delta_{\text{C}}(75 \text{ MHz; CDCl}_3)$  41.0 (t), 125.9 (d), 126.3 (d), 127.3 (d), 127.7 (d), 127.7 (d), 128.2 (d), 128.4 (d), 130.7 (s), 133.4 (s), 176.6 (s).

*2-(2'-Naphthyl)ethanol.* 2-Naphthylacetic acid (5 g, 0.0269 mole) in dry ether (125 ml) was added slowly to a 2 molar excess of lithium aluminium hydride (3.80 g, 0.0537 mole) in dry ether (25 ml) and refluxed overnight. The crude reaction mixture was cooled in ice and dilute HCl added. The ether layer was separated, washed with 10%  $\text{Na}_2\text{CO}_3$  solution then water and dried with  $\text{Na}_2\text{SO}_4$ . Removal of the ether gave 2-(2'-naphthyl)ethanol (4.12 g, 89%) as a yellow oil which solidified on standing and this was used without further purification, mp 65-66 °C (lit.,<sup>2</sup> 66-67 °C);  $\nu_{\max}(\text{CHCl}_3)/\text{cm}^{-1}$  3618br (OH), 1600s (C=C), 1044;  $\delta_{\text{H}}(300 \text{ MHz; CDCl}_3)$  3.06 (2H, t,  $\text{ArCH}_2$ ), 3.98 (2H, br,  $\text{CH}_2\text{OH}$ ), 7.39 (1H, d, Ar-H), 7.48 (2H, m, Ar-H), 7.71 (1H, s, Ar-H), 7.83 (3H, m, Ar-H);  $\delta_{\text{C}}(75 \text{ MHz; CDCl}_3)$  39.4 (t), 63.5 (t), 125.5 (d), 126.1 (d), 127.4 (d), 127.5 (d), 127.7 (d), 128.2 (d), 128.3 (d), 132.3 (s), 133.6 (s), 136.0 (s).

### 3-(2'-Naphthyl)-1-propanol

*3-(2'-Naphthyl)propenoic acid.* A mixture containing 2-naphthaldehyde (10 g, 0.0640 mol), malonic acid (6.66 g, 0.06402 mol) and  $\alpha$ -picoline (5.96 g, 0.06402 mol) was heated overnight at 70°C. The reaction mixture was treated with water (100 ml) and concentrated HCl (25 ml), heated to 100°C and filtered to remove unreacted 2-naphthaldehyde. The mixture was cooled and filtered. The crude solid was then dissolved in a minimum of boiling NaOH (5%) and Norit added. The mixture was

then filtered at 100°C and acidified with HCl, cooled and filtered to give 3-(2'-naphthyl)propenoic acid (10.83g 85%), mp 204-205 °C (lit.,<sup>3</sup> 206 °C);  $\nu_{\max}(\text{CHCl}_3)/\text{cm}^{-1}$  1686s (C=O), 1626s (C=C), 1288s;  $\delta_{\text{H}}(300 \text{ MHz, CDCl}_3)$  6.58 (1H, d, Ar-CH=CH), 7.55 (2H, m, Ar-H), 7.72 (1H, d, Ar-H), 7.87-8.0 (5H, m, Ar-H, Ar-CH=CH);  $\delta_{\text{C}}(75 \text{ MHz; CDCl}_3)$  117.2 (d), 123.5 (d), 126.8 (d), 127.5 (d), 127.8 (d), 128.7 (d), 128.8 (d), 130.4 (d), 131.6 (s), 133.3 (s), 134.5 (s), 147.1 (d), 171.0 (s).

*3-(2'-Naphthyl)propanoic acid.* A mixture of 5% palladium/carbon catalyst (300 mg) and methanol (250 ml) was stirred under hydrogen for 1 hour. 3-(2'-naphthyl)propenoic acid (10 g) was added and the mixture was stirred for 5 hours under hydrogen. Filtration and concentration yielded 3-(2'-naphthyl)propanoic acid almost quantitatively, mp 130-131 °C (lit.,<sup>4</sup> 135-136 °C);  $\nu_{\max}(\text{CHCl}_3)/\text{cm}^{-1}$  1710s (C=O);  $\delta_{\text{H}}(300 \text{ MHz; CDCl}_3)$  2.81 (2H, t, ArCH<sub>2</sub>CH<sub>2</sub>), 3.16 (2H, t, ArCH<sub>2</sub>), 7.37 (1H, d, Ar-H), 7.47 (2H, m, Ar-H), 7.68 (1H, s, Ar-H), 7.82 (3H, m, Ar-H);  $\delta_{\text{C}}(75 \text{ MHz; CDCl}_3)$  30.8 (t), 35.4 (t), 125.5 (d), 126.1 (d), 126.5 (d), 126.9 (d), 127.5 (d), 127.6 (d), 128.2 (d), 132.2 (s), 133.6 (s), 137.6 (s), 178.5 (s).

*3-(2'-Naphthyl)-1-propanol.* 3-(2'-Naphthyl)propanoic acid (10 g, 0.05 mole) in dry ether (250 ml) was added slowly to a 2 molar excess of lithium aluminium hydride (3.80 g, 0.10 mole) in dry ether (50 ml) and refluxed overnight. The crude reaction mixture was cooled in ice and dilute HCl added. The ether layer was separated, washed with 10% Na<sub>2</sub>CO<sub>3</sub> solution then water and dried with Na<sub>2</sub>SO<sub>4</sub>. Removal of the ether gave 3-(2'-naphthyl)-1-propanol (8.56 g, 92%) as a yellow oil which solidified upon standing was used without further purification, mp 31-32 °C (lit.,<sup>5</sup> 33 °C);  $\nu_{\max}(\text{CHCl}_3)/\text{cm}^{-1}$  3625br (OH), 1600m (C=C), 1507m, 1040s;  $\delta_{\text{H}}(300 \text{ MHz; CDCl}_3)$  2.02 (2H, qui, OCH<sub>2</sub>CH<sub>2</sub>), 2.91 (2H, t, ArCH<sub>2</sub>), 3.73 (2H, t, OCH<sub>2</sub>), 7.38 (1H, d, Ar-H), 7.47 (2H, m, Ar-H), 7.67 (1H, s, Ar-H), 7.82 (3H, m, Ar-H);  $\delta_{\text{C}}(75 \text{ MHz; CDCl}_3)$  32.2 (t), 34.1 (t), 62.2 (t), 125.2 (d), 126.0 (d), 126.4 (d), 127.3 (d), 127.4 (d), 127.6 (d), 128.0 (d), 132.1 (s), 133.7 (s), 139.3 (s).

## Synthesis alkyl bromides

*Method 1.* The alkyl bromides were prepared from the appropriate alcohols by refluxing with HBr-H<sub>2</sub>SO<sub>4</sub> in ether. The mixtures were washed with conc. HCl, H<sub>2</sub>O, 10% aq. Na<sub>2</sub>CO<sub>3</sub>, H<sub>2</sub>O and extracted with DCM. Concentration *in vacuo* provided the alkyl bromides in good yield (>90%) and high purity (<sup>1</sup>H, <sup>13</sup>C NMR).

*Method 2.* Alkyl Bromides were prepared from the appropriate arylmethyl compound by refluxing with a slight excess of *N*-bromosuccinimide in carbon tetrachloride for a period of 4-16 hours. The

mixture was filtered to remove succinimide and the solvent removed *in vacuo*. The bromides were produced in good yields with high purity and generally used without further purification.

*1-Bromomethylnaphthalene* (method 2). 1-Methylnaphthalene (10 g, 0.0602 mol) was dissolved in carbon tetrachloride (70 ml) and to this was added *N*-bromosuccinimide (12.5 g, 0.0702 mol) and benzoyl peroxide (0.5 g) and the mixture heated under reflux for 16 hr. The reaction was cooled in ice and the solid succinimide removed via filtration. The solvent was removed under reduced pressure, affording the title compound as a heavy oil which was used without further purification (9.4g 64%).  $\delta_{\text{H}}$ (300 MHz,  $\text{CDCl}_3$ ) 5.01 (2H, s,  $\text{CH}_2\text{Br}$ ), 7.45 (1H, t, Ar-H), 7.59 (2H, m, Ar-H), 7.68 (1H, t, Ar-H), 7.89 (1H, d, Ar-H), 7.94 (1H, d, Ar-H), 8.23 (1H, d, Ar-H);  $\delta_{\text{C}}$ (75 MHz  $\text{CDCl}_3$ ) 31.8 (t), 123.8 (d), 125.5 (d), 126.3 (d), 126.7 (d), 127.7 (d), 128.9 (d), 129.8 (d), 131.1 (s), 133.3 (s), 134.1 (s).

*2-Bromomethylnaphthalene* (method 2). 2-Methylnaphthalene (10.00 g, 0.0602 mol) was dissolved in carbon tetrachloride (70 ml) and to this was added *N*-bromosuccinimide (12.5 g, 0.0702 mol) and benzoyl peroxide (0.5 g) and the mixture heated under reflux for 16 hr. The reaction was cooled in ice and the solid succinimide removed via filtration. The solvent was removed under reduced pressure and the title compound solidified on cooling. Recrystallisation from ethanol afforded pure 2-bromomethylnaphthalene (10.6 g 72%). m.p. 55°C (lit<sup>6</sup> m.p. 56°C);  $\delta_{\text{H}}$ (300 MHz,  $\text{CDCl}_3$ ) 4.69 (2H, m,  $\text{CH}_2\text{CH}_2\text{Br}$ ), 7.52 (3H, m, Ar-H), 7.84 (4H, m, Ar-H);  $\delta_{\text{C}}$ (75 MHz  $\text{CDCl}_3$ ) 34.0 (t), 126.5 (d), 126.6 (d), 126.8 (d), 127.7 (d), 127.9 (d), 128.0 (d), 128.8 (d), 133.1 (s), 133.2 (s), 135.1 (s).

*2-(2'-Naphthyl)ethyl bromide* (method 1). 2-(2'-Naphthyl)ethyl alcohol (2.0 g, 0.012 mol) was added to 45 ml conc. HBr and refluxed for 3 hr. 2-(2'-Naphthyl)ethyl bromide was extracted with chloroform (3 x 30 ml) and successively washed with conc. HCl,  $\text{H}_2\text{O}$  and 10%  $\text{Na}_2\text{CO}_3$ . Drying over  $\text{Na}_2\text{SO}_4$  and concentration under reduced pressure afforded 2-(2'-Naphthyl)ethyl bromide which was used without further purification (2.23 g, 82%). m.p. 62°C (lit<sup>7</sup> m.p. 64-65°C)  $\delta_{\text{H}}$ (300 MHz,  $\text{CDCl}_3$ ) 3.36 (2H, t,  $\text{ArCH}_2$ ), 3.69 (2H, t,  $\text{CH}_2\text{Br}$ ), 7.36 (1H, d, Ar-H), 7.49 (2H, m, Ar-H), 7.70 (1H, s, Ar-H), 7.78-7.87 (3H, m, Ar-H);  $\delta_{\text{C}}$ (75 MHz  $\text{CDCl}_3$ ) 32.8 (t), 39.6 (t), 125.7 (d), 126.2 (d), 126.9 (d), 127.3 (d), 127.6 (d), 127.7 (d), 128.3 (d), 132.5 (s), 133.5 (s), 136.3 (s).

*3-(2'-Naphthyl)-1-propyl bromide* (method 1). 3-(2'-Naphthyl)-1-propyl alcohol (1.21 g, 6.5 mmol) was added to 40ml conc. HBr and refluxed for 4 hours. 3-(2'-Naphthyl)-1-propyl bromide was extracted with chloroform (3 x 25 ml) and successively washed with conc. HCl,  $\text{H}_2\text{O}$  and 10%  $\text{Na}_2\text{CO}_3$ . Drying over  $\text{Na}_2\text{SO}_4$  and concentration under reduced pressure afforded 3-(2'-naphthyl)-1-

propyl bromide (1.46 g, 90%) as a brown oil and this was used without further purification.  $\delta_{\text{H}}$ (300 MHz,  $\text{CDCl}_3$ ) 2.29 (2H, qui,  $\text{CH}_2\text{CH}_2\text{CH}_2$ ), 2.98 (2H, t,  $\text{ArCH}_2$ ), 3.46 (2H, t,  $\text{CH}_2\text{O}$ ), 7.35 (1H, d, Ar-H), 7.48 (2H, m, Ar-H), 7.68 (1H, s, Ar-H), 7.76-7.85 (3H, m, Ar-H);  $\delta_{\text{C}}$ (75 MHz  $\text{CDCl}_3$ ) 33.1 (t), 34.1 (t), 34.1 (t), 125.4 (d), 126.1 (d), 126.8 (d), 127.2 (d), 127.5 (d), 127.6 (d), 128.2 (d), 132.2 (s), 133.6 (s), 138.0 (s).

### DNA Sequence plasmid pBR322:

A partial sequence of the 375 base pair *EcoRI* to *BamHI* fragment of plasmid pBR322 DNA used in DNA damage studies is presented below.<sup>8</sup>

|                |             |            |               |            |
|----------------|-------------|------------|---------------|------------|
| 31             | 41          | 51         | 61            | 71         |
| GCTTTAATGC     | GGTAGTTTAT  | CACAGTTAAA | TTGCTAACGC    | AGTCAGGCAC |
| 3' -CGAAATTACG | CCATCAAATA  | GTGTCAATTT | AACGATTGCG    | TCAGTCCGTG |
| 81             | 91          | 101        | 111           | 121        |
| CGTGTATGAA     | ATCTAACAAAT | GCGCTCATCG | TCATCCTCGG    | CACCGTCACC |
| GCACATACTT     | TAGATTGTTA  | CGCGAGTAGC | AGTAGGAGCC    | GTGGCAGTGG |
| 131            | 141         | 151        | 161           |            |
| CTGGATGCTG     | TAGGCATAGG  | CTTGGGTTAT | GCCGGTACTG    |            |
| GACCTACGAC     | ATCCGTATCC  | GAACCCAATA | CGGCCATGAC-5' |            |



## Dose-response plots for mutagenicity in *S.typhimurium* TA100 and TA98

Dose response plots for mutagens **2-9** in *S. typhimurium* TA100:

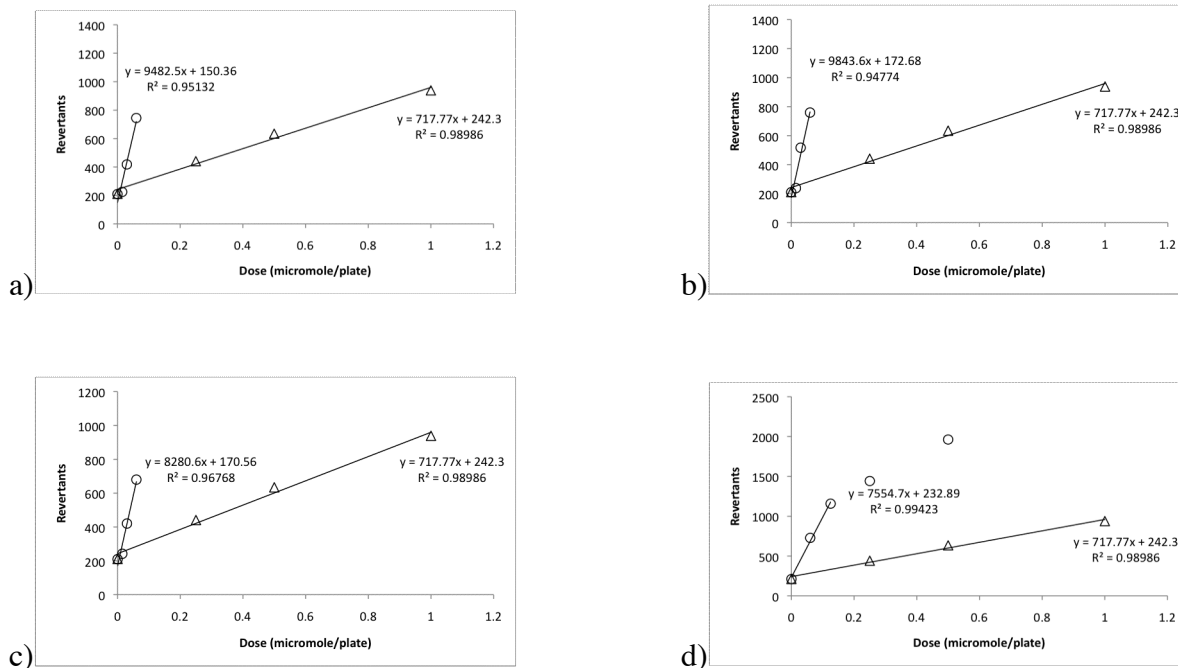

**Figure S1.** Dose-response (circles) for a) *N*-acetoxy-*N*-butoxy-2-naphthamide **2**, b) *N*-butoxy-*N*-2-naphthoyloxyacetamide **3**, c) *N*-acetoxy-*N*-(1-naphthylmethoxy)acetamide **6** and d) *N*-acetoxy-*N*-(2-naphthylmethoxy)acetamide **7** along with standard *N*-acetoxy-*N*-butoxybenzamide **14** (triangles) in *S. typhimurium* TA100; data from Table 2.

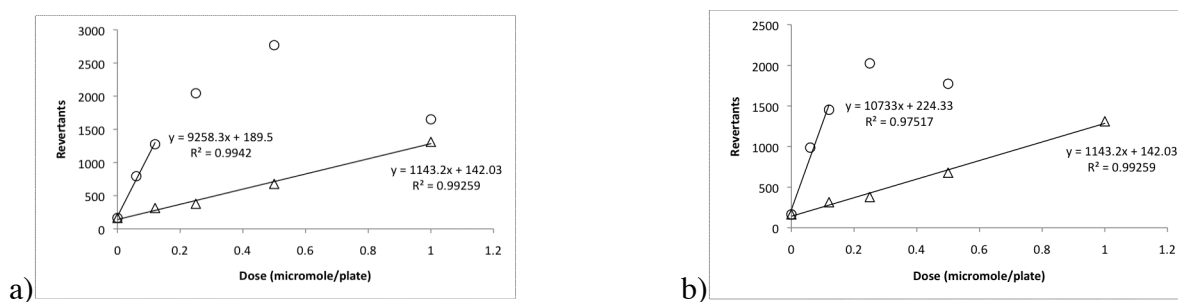

**Figure S2.** Dose-response (circles) for a) *N*-acetoxy-*N*-(2-(2'-naphthyl)ethoxy)acetamide **8** and b) *N*-acetoxy-*N*-(3-(2'-naphthyl)propyloxy)acetamide **9** along with standard *N*-acetoxy-*N*-butoxybenzamide **14** (triangles) in *S. typhimurium* TA100; data from Table 3.

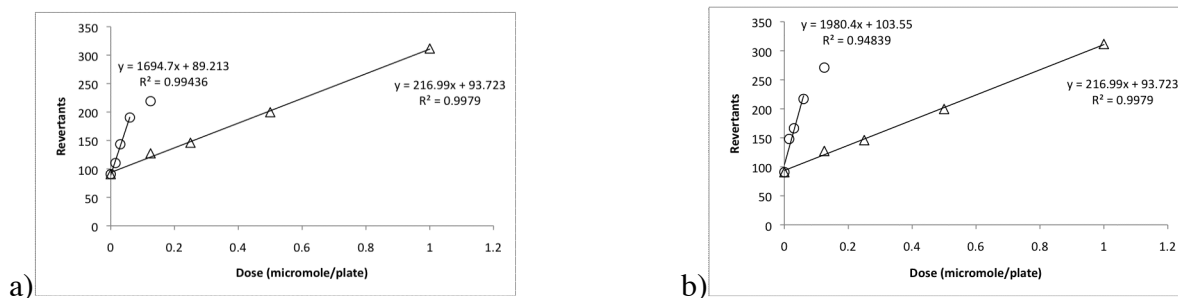

**Figure S3.** Dose-response (circles) for a) *N*-butoxy-*N*-(2-naphthylacetoxy)acetamide **4** and b) *N*-butoxy-*N*-(3-(2-naphthyl)propanoyloxy)acetamide **5** along with standard *N*-acetoxy-*N*-butoxybenzamide **14** (triangles) in *S. typhimurium* TA100; data from Table 4.

Dose response plots for mutagens in *S. typhimurium* TA98 (data from Table 6):

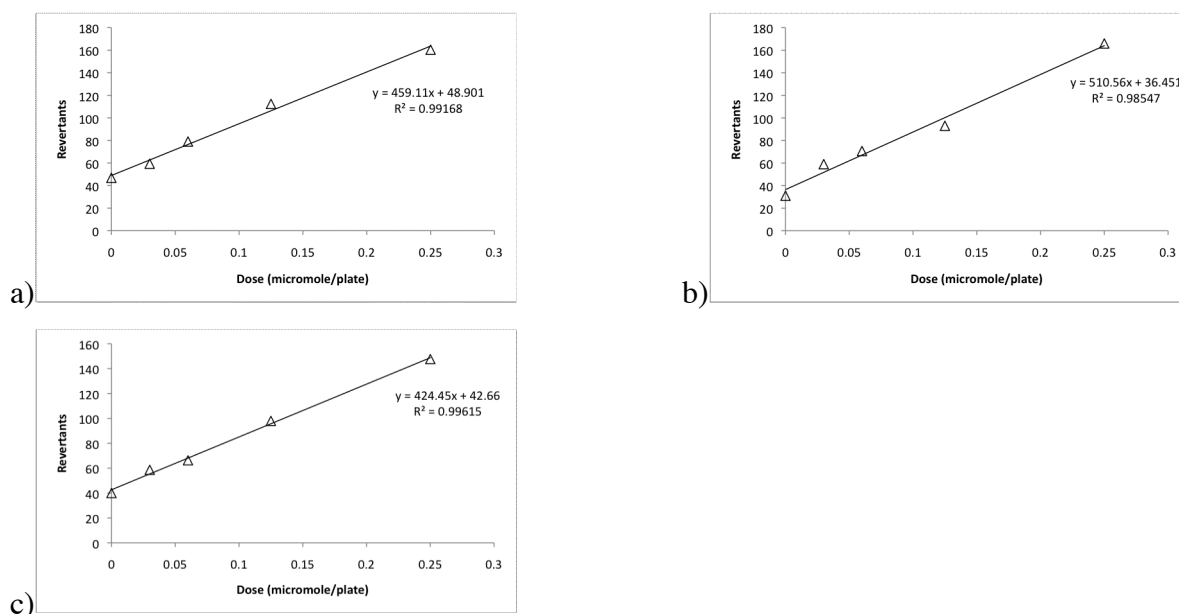

**Figure S4.** Mutagenic activity of *N*-acetoxy-*N*-butoxy-2-naphthamide **2**, a) test A, b) test B, c) test C in *S. typhimurium* TA98.

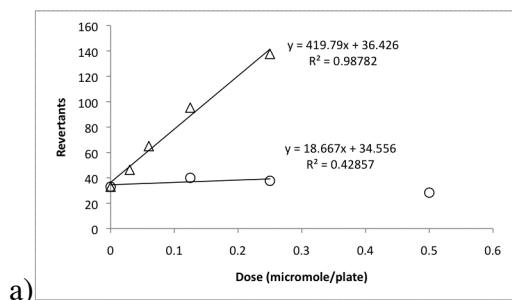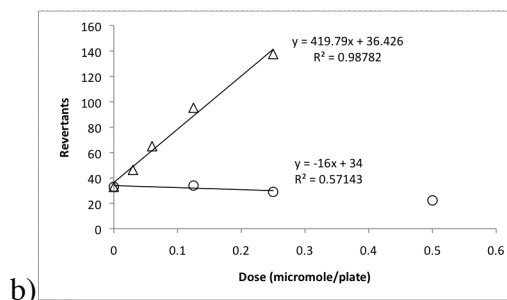

**Figure S5.** Test set D - Dose-response (circles) for a) *N*-acetoxy-*N*-butoxybenzamide **14** and b) *N*-benzyloxy-*N*-butoxyacetamide **15** along with standard *N*-acetoxy-*N*-butoxy-2-naphthamide **2** (triangles) in *S. typhimurium* TA98

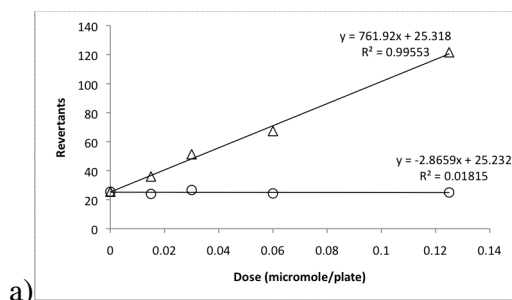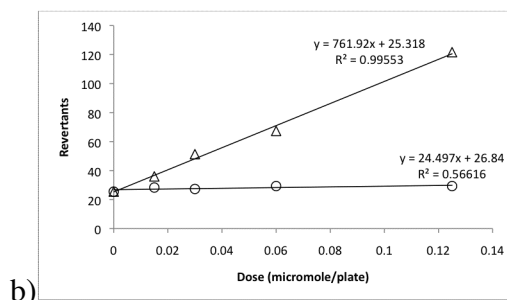

**Figure S6.** Test set E - Dose-response (circles) for a) *N*-butoxy-*N*-ethoxy-2-naphthamide **16** and b) *N*-butoxy-*N*-(2-naphthoyloxy)acetamide **3** along with standard *N*-acetoxy-*N*-butoxy-2-naphthamide **2** (triangles) in *S. typhimurium* TA98

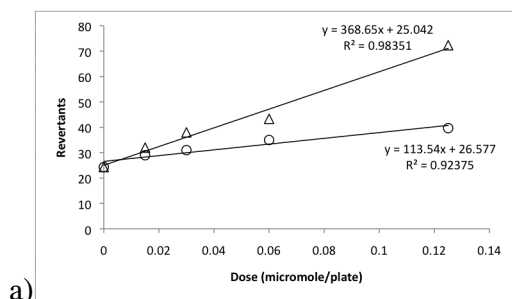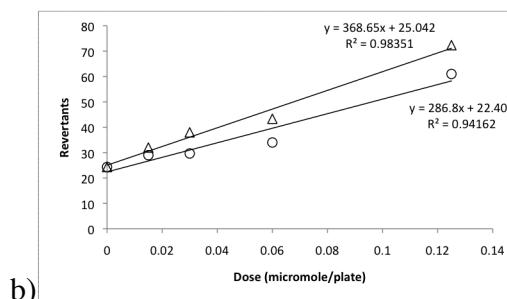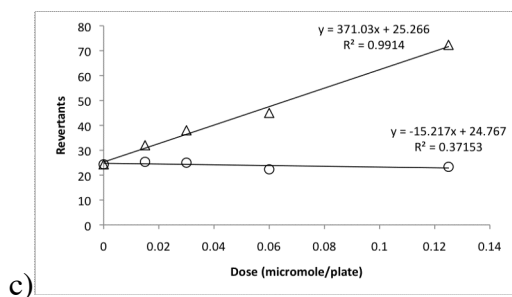

**Figure S7.** Test set F – Dose-response (circles) for a) *N*-acetoxy-*N*-(1-naphthylmethoxy)acetamide **6**, b) *N*-acetoxy-*N*-(2-naphthylmethoxy)acetamide **7** and c) *N*-butoxy-*N*-methyl-2-naphthamide **17** along with standard *N*-acetoxy-*N*-butoxy-2-naphthamide **2** (triangles) in *Salmonella typhimurium* TA98

## References

- 1 H. Gilman and J. E. Kirby, *J. Am. Chem. Soc.*, 1929, **51**, 3475.
- 2 W. Davies and Q. N. Porter, *J. Chem. Soc.*, 1956, 2609.
- 3 E. Koepp and F. Voegtle, *Synthesis*, 1977, 177.
- 4 J. C. Westfahl, *J. Am. Chem. Soc.*, 1954, **76**, 1076.
- 5 O. Tsuge, M. Nishinohara and M. Tashiro, *Bull. Chem. Soc. Jpn.*, 1963, **36**, 1477.
- 6 J. B. Shoesmith and H. Rubli, *J. Chem. Soc.*, 1927, 3098.
- 7 *Beilstein Handbuch der Organische Chemie*, 1979, **5, IV**, 1708.
- 8 T. M. Banks, A. M. Bonin, S. A. Glover and A. S. Prakash, *Org. Biomol. Chem.*, 2003, **1**, 2238
